# Supplementary material for: Dose–response relationship between alcohol consumption and workplace absenteeism in Australia
Source: PubMed Central journal article supplement (PMC10947312; doi:10.1111/dar.13726), 2023-07-30
Supplement: DAR-42-1773-s001.pdf [file DAR-42-1773-s001.pdf]

## Multiple Imputations by Chained Equation

We used the following variables to perform multiple imputation by chained equation in Stata

- Outcomes (broader sickness absence, alcohol-related sickness absence)
- covariates (sex, age group, household income, occupation, highest qualification, SEIFA, marital status, daily smoking)
- exposures (daily alcohol consumption and HED frequency).

We performed multiple imputations by chained equation (MICE) to account for missing data from our dataset using the 'mi impute' suites in Stata based on Rubin's rules (Alpman, 2016; Royston, 2014; Royston & White, 2011). The chained equation executed 6 imputations (the maximum of the universally accepted number of imputations 2-10) (Von Hippel, 2020). (Eddings & Marchenko, 2012).

Multivariate imputation                    Imputations =        6  
 Chained equations                        added =               6  
 Imputed: *m*=1 through *m*=6            updated =             0  
 Initialization: monotone                Iterations =         60  
                                               burn-in =            10

any\_absence: ordered logistic regression  
 any\_ab~e\_in\_il: ordered logistic regression  
 totvol3\_recode: ordered logistic regression  
 agegroup1470~e: ordered logistic regression  
 marstat: ordered logistic regression  
 comorbidity: ordered logistic regression  
 dailysmoking: logistic regression  
 recode\_occup~n: ordered logistic regression  
 sex: logistic regression  
 recode\_hhinc~e: ordered logistic regression  
 recode\_educ~n: ordered logistic regression  
 seifaquintil~e: ordered logistic regression  
 asgs3: ordered logistic regression

| Variable       | Observations per <i>m</i> |            |         | Total |
|----------------|---------------------------|------------|---------|-------|
|                | Complete                  | Incomplete | Imputed |       |
| any_absence    | 8118                      | 1445       | 1445    | 9563  |
| any_ab~e_in_il | 7052                      | 2511       | 2511    | 9563  |
| totvol3_recode | 9110                      | 453        | 453     | 9563  |
| agegroup1470~e | 9563                      | 0          | 0       | 9563  |
| marstat        | 9527                      | 36         | 36      | 9563  |
| comorbidity    | 9481                      | 82         | 82      | 9563  |
| dailysmoking   | 9563                      | 0          | 0       | 9563  |
| recode_occup~n | 9164                      | 399        | 399     | 9563  |
| sex            | 9563                      | 0          | 0       | 9563  |
| recode_hhinc~e | 8447                      | 1116       | 1116    | 9563  |
| recode_educ~n  | 7458                      | 2105       | 2105    | 9563  |
| seifaquintil~e | 9563                      | 0          | 0       | 9563  |
| asgs3          | 5368                      | 4195       | 4195    | 9563  |

(Complete + Incomplete = Total; Imputed is the minimum across *m* of the number of filled-in observations.)

Sensitivity analysis for using complete case analysis (non-imputed dataset)

|                                      | Alcohol-related absenteeism |             |              |                   |              |             |              |                   | Broader sickness absenteeism |             |             |                   |           |             |             |             |             |
|--------------------------------------|-----------------------------|-------------|--------------|-------------------|--------------|-------------|--------------|-------------------|------------------------------|-------------|-------------|-------------------|-----------|-------------|-------------|-------------|-------------|
|                                      | Unadjusted                  |             |              |                   | Adjusted*    |             |              |                   | Unadjusted                   |             |             |                   | Adjusted* |             |             |             |             |
|                                      | OR                          | 95% CI      | P            |                   | OR           | 95% CI      | P            |                   | OR                           | 95% CI      | P           |                   | OR        | 95% CI      | P           |             |             |
| <b>Average daily drinking</b>        |                             |             |              |                   |              |             |              |                   |                              |             |             |                   |           |             |             |             |             |
| Abstainers                           | -                           |             |              |                   | -            |             |              |                   | 0.76                         | 0.62        | 0.93        | <b>0.008</b>      |           | <b>0.75</b> | <b>0.61</b> | <b>0.93</b> | <b>0.01</b> |
| Light to Moderate                    | Ref                         |             |              |                   | Ref          |             |              |                   | Ref                          |             |             |                   |           | Ref         |             |             |             |
| Risky                                | <b>3.70</b>                 | <b>2.24</b> | <b>6.12</b>  | <b>&lt;0.0001</b> | <b>3.64</b>  | <b>2.15</b> | <b>6.16</b>  | <b>&lt;0.0001</b> | <b>0.81</b>                  | <b>0.63</b> | <b>1.04</b> | 0.104             |           | <b>0.84</b> | <b>0.65</b> | <b>1.10</b> | 0.20        |
| High Risk                            | <b>6.54</b>                 | <b>3.87</b> | <b>11.05</b> | <b>&lt;0.0001</b> | <b>5.78</b>  | <b>3.29</b> | <b>10.16</b> | <b>&lt;0.0001</b> | 1.00                         | 0.74        | 1.36        | 0.985             |           | <b>1.00</b> | <b>0.73</b> | <b>1.36</b> | 0.98        |
| <b>Heavy episodic drinking (HED)</b> |                             |             |              |                   |              |             |              |                   |                              |             |             |                   |           |             |             |             |             |
| Abstainers                           | -                           |             |              |                   | -            |             |              |                   | 0.91                         | 0.69        | 1.20        | 0.502             |           | 0.90        | 0.68        | 1.18        | 0.44        |
| Never                                | Ref                         |             |              |                   | Ref          |             |              |                   | Ref                          |             |             |                   |           | Ref         |             |             |             |
| Less than monthly                    | 2.18                        | 0.98        | 4.86         | 0.06              | 1.84         | <b>0.80</b> | <b>4.21</b>  | 0.15              | <b>1.39</b>                  | <b>1.16</b> | <b>1.65</b> | <b>&lt;0.0001</b> |           | <b>1.30</b> | <b>1.08</b> | <b>1.56</b> | <b>0.01</b> |
| Monthly but less than weekly         | 3.34                        | 1.63        | 6.87         | <b>&lt;0.0001</b> | <b>3.08</b>  | <b>1.28</b> | <b>5.76</b>  | <b>&lt;0.0001</b> | <b>1.28</b>                  | <b>1.07</b> | <b>1.55</b> | <b>0.009</b>      |           | 1.14        | 0.93        | 1.38        | 0.21        |
| Weekly or more                       | 12.12                       | 6.34        | 23.16        | <b>&lt;0.0001</b> | <b>11.68</b> | <b>4.72</b> | <b>19.24</b> | <b>&lt;0.0001</b> | <b>1.18</b>                  | <b>0.97</b> | <b>1.44</b> | <b>0.047</b>      |           | 1.11        | 0.90        | 1.37        | 0.34        |

Adjusted for sex, age group, household income, occupation, highest qualification, SEIFA, marital status, daily smoking

- Alpman, A. (2016). Implementing Rubin's alternative multiple-imputation method for statistical matching in Stata. *The Stata Journal*, 16(3), 717-739.
- Eddings, W., & Marchenko, Y. (2012). Diagnostics for multiple imputation in Stata. *The Stata Journal*, 12(3), 353-367.
- Royston, P. (2014). ICE: Stata module for multiple imputation of missing values.
- Royston, P., & White, I. R. (2011). Multiple imputation by chained equations (MICE): implementation in Stata. *Journal of statistical software*, 45, 1-20.
- Von Hippel, P. T. (2020). How many imputations do you need? A two-stage calculation using a quadratic rule. *Sociological Methods & Research*, 49(3), 699-718.
